# Supplementary material
Source: PubMed Central journal article supplement (PMC4965344)
Supplement: NIHMS751158-supplement-Supp_Fig_S1.pdf [file NIHMS751158-supplement-Supp_Fig_S1.pdf]

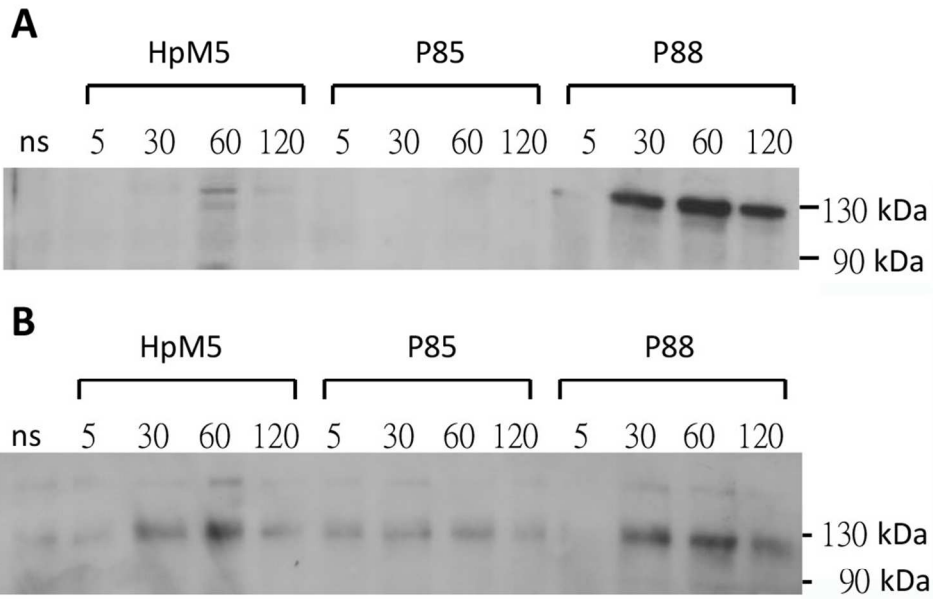

Supplementary Figure 1. Translocation of *H. pylori* CagA into mouse gastric epithelial cells varies between strains of *H. pylori*. CagA-specific immunoblot analysis demonstrating (A) translocation of CagA into mouse GSM06 epithelial cells following co-culture with either HpM5, P85, or P88 for up to 120 minutes and (B) phosphorylated CagA in the same cell lysates.

95x72mm (300 x 300 DPI)
